# Supplementary material for: Evidence of multiple pathways capable of emitting peroxyoxalate chemiluminescence using a charge coupled devicespectrometer
Source: Royal Society of Chemistry journal article supplement (doi:10.1039/c1cc10554j), 2011-01-01
Supplement: c1cc10554j.pdf [file c1cc10554j.pdf]

## Supplementary Information

### **Evidence of multiple pathways capable of emitting peroxyoxalate chemiluminescence using a charge coupled device spectrometer**

**Paul S. Park<sup>a,b,#</sup>, Tae-Ho D. Rho<sup>b,c,#</sup>, Young Teck Kim<sup>d</sup>, Seok Oh Ko<sup>e</sup>,  
Mark A. Schlautman<sup>f</sup>, Elizabeth R. Carraway<sup>f</sup>, Ji Hoon Lee<sup>b,\*</sup>**

<sup>a</sup> The Department of Chemical and Biomolecular Engineering, Johns Hopkins University, Baltimore, MD 21218 United States

<sup>b</sup> Luminescent MD, LLC, 20140 Scholar Drive. Hagerstown, MD 21742, United States

<sup>c</sup> Department of Physics, Brown University, Providence, RI 02912, United States

<sup>d</sup> Department of Wood Science & Forest Products, Virginia Polytechnic Institute & State University, Blacksburg, VA 24061 United States

<sup>e</sup> Department of Civil Engineering, Kyung Hee University, 1, Seochun-Dong, Giheung-Gu, Yongin-Si 409-701, Republic of Korea

<sup>f</sup> Department of Environmental Engineering and Earth Sciences, Clemson University, Anderson, SC 29625, United States

**Table 1** Comparison of background emission characteristics generated in ODI derivative CL reactions

|                        | <i>ODI<sup>d</sup></i> | <i>OD2MI<sup>d</sup></i> | <i>OD2EI<sup>d</sup></i> | <i>OD4MI<sup>d</sup></i> | <i>OD2MI + OD4MI<sup>d</sup></i> |
|------------------------|------------------------|--------------------------|--------------------------|--------------------------|----------------------------------|
| $I_{\max}^a$           | 0.60                   | 0.05                     | 0.02                     | 1.00                     | 0.80                             |
| $\tau_{\max}^b$        | 0.34                   | 0.40                     | 0.52                     | 0.30                     | 0.30                             |
| $\tau_{\text{half}}^c$ | 0.90                   | 2.09                     | 3.87                     | 0.45                     | 0.45                             |

<sup>a</sup> Relative maximum background intensity for each experimental condition normalized by that observed for the OD4MI CL reaction. <sup>b</sup> Time to reach the maximum emission (sec). <sup>c</sup> half-life of the decay (sec). <sup>d</sup> ODI derivatives formed from the reaction between TCPO and ImH derivatives for 90 seconds at room temperature ( $21 \pm 2.0$  °C). Reaction condition: [TCPO] = 1.0 mM, [ImH derivative] = 10.0 mM, [H<sub>2</sub>O<sub>2</sub>] = 0.1 M in the mixture of 50% acetonitrile + 50% ethyl acetate. Background emissions were measured with PTI with photo-multiplier tube.

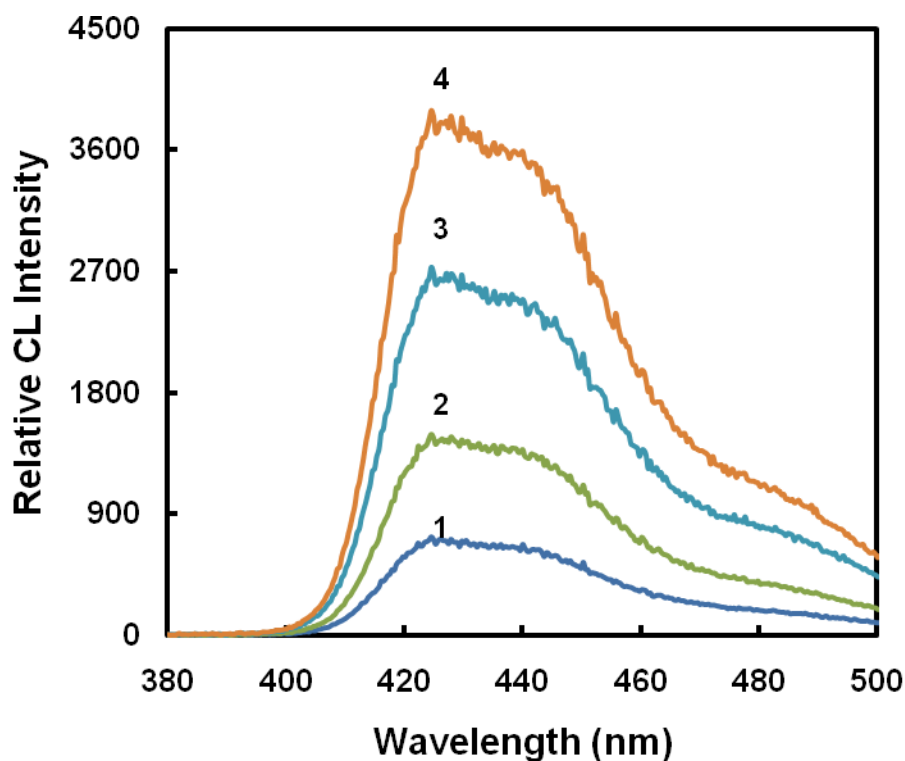

**Fig. S-1.** CL spectra observed in ODI derivative CL reactions.  
1. OD2EI-CL, 2. OD2MI-CL, 3. ODI-CL, 4. OD4MI-CL.

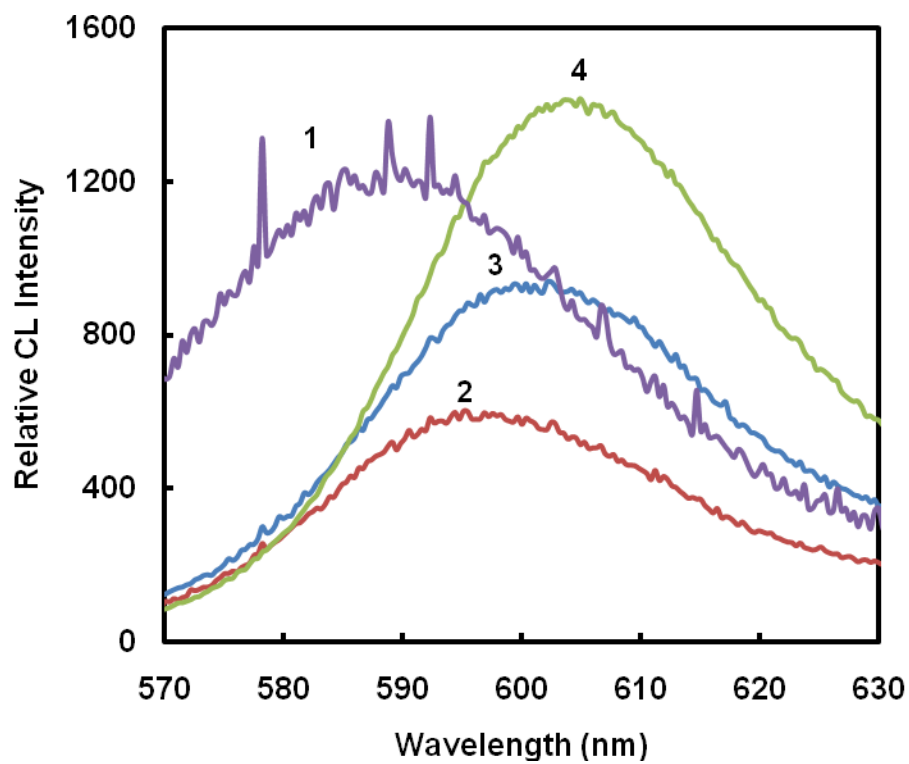

Fig. S-2. Fluorescence and CL spectra of rhodamine 101 in mixture (50 % ethyl acetate, 25 % water, and 25 % isopropyl alcohol). 1. Fluorescence, 2. ODI-CL, 3. TCPO-CL, 4. DNPO-CL
